# Supplementary material for: DNA supercoiling regulates the stress-inducible expression of genes in the cyanobacterium Synechocystis
Source: Royal Society of Chemistry journal article supplement (doi:10.1039/b903022k), 2009-09-10
Supplement: table_s2.pdf [file table_s2.pdf]

**Table S2.** The effect of novobiocin on NaCl-induced gene expression

| ORF no.                                                                           | Gene         | Product                                     | IF - NB    | IF + NB    |
|-----------------------------------------------------------------------------------|--------------|---------------------------------------------|------------|------------|
| <b>Genes whose NaCl inducibility was markedly reduced by novobiocin treatment</b> |              |                                             |            |            |
| sll1514                                                                           | <i>hspA</i>  | 16.6 kDa small heat shock protein           | 70.2 ± 2.1 | 15.1 ± 0.6 |
| sll0528                                                                           |              | Hypothetical protein                        | 69.5 ± 2.5 | 4.4 ± 0.6  |
| sll0939                                                                           |              | Hypothetical protein                        | 51.9 ± 3.0 | 9.4 ± 0.7  |
| slr1285                                                                           | <i>hik34</i> | Histidine kinase Hik34                      | 44.0 ± 3.4 | 1.6 ± 0.4  |
| slr0967                                                                           |              | Hypothetical protein                        | 42.0 ± 1.5 | 5.5 ± 0.3  |
| slr1544                                                                           |              | Hypothetical protein                        | 25.7 ± 1.1 | 2.1 ± 0.1  |
| sll0846                                                                           |              | Hypothetical protein                        | 25.7 ± 1.0 | 5.3 ± 0.1  |
| slr1963                                                                           |              | Water-soluble carotenoid protein            | 22.8 ± 0.7 | 1.0 ± 0.1  |
| slr1641                                                                           | <i>clpB1</i> | ClpB protein                                | 22.5 ± 0.5 | 2.4 ± 0.1  |
| sll0306                                                                           | <i>sigB</i>  | RNA polymerase sigma factor                 | 21.4 ± 1.5 | 2.2 ± 0.1  |
| slr1603                                                                           |              | Hypothetical protein                        | 20.4 ± 1.5 | 1.0 ± 0.1  |
| slr0959                                                                           |              | Hypothetical protein                        | 18.1 ± 0.9 | 5.9 ± 0.3  |
| sll1722                                                                           |              | Hypothetical protein                        | 16.6 ± 0.4 | 1.6 ± 0.2  |
| sll1167                                                                           | <i>pbp</i>   | Penicillin-binding protein 4                | 15.9 ± 0.3 | 1.4 ± 0.3  |
| slr1516                                                                           | <i>sodB</i>  | Superoxide dismutase                        | 15.5 ± 0.4 | 2.2 ± 0.3  |
| sll1594                                                                           | <i>ndhR</i>  | Transcriptional regulator                   | 15.0 ± 1.2 | 0.7 ± 0.1  |
| slr1971                                                                           |              | Hypothetical protein                        | 13.7 ± 0.7 | 2.4 ± 0.2  |
| slr1704                                                                           |              | Hypothetical protein                        | 13.3 ± 0.5 | 3.3 ± 0.2  |
| sll1085                                                                           | <i>glpD</i>  | Glycerol-3-P dehydrogenase                  | 12.8 ± 0.5 | 2.0 ± 0.2  |
| ssl2542                                                                           | <i>hliA</i>  | High light inducible protein                | 12.6 ± 0.3 | 7.1 ± 0.1  |
| slr1915                                                                           |              | Hypothetical protein                        | 12.6 ± 0.3 | 4.1 ± 0.3  |
| sll1483                                                                           |              | Periplasmic protein                         | 11.6 ± 1.2 | 2.9 ± 0.1  |
| sll0170                                                                           | <i>dnaK2</i> | Heat shock protein 70                       | 11.5 ± 0.7 | 0.9 ± 0.1  |
| sll1884                                                                           |              | Hypothetical protein                        | 11.1 ± 0.4 | 1.3 ± 0.1  |
| slr1686                                                                           |              | Hypothetical protein                        | 11.0 ± 0.4 | 4.9 ± 0.2  |
| ssr2595                                                                           | <i>hliB</i>  | High light inducible protein                | 10.9 ± 0.4 | 2.1 ± 0.2  |
| slr1485                                                                           |              | Phosphatidylinositol phosphate kinase       | 10.5 ± 0.3 | 4.3 ± 0.2  |
| sll0938                                                                           |              | N-Succinyl-diaminopimelate aminotransferase | 10.3 ± 0.5 | 6.0 ± 0.4  |
| sll1797                                                                           | <i>ycf21</i> | Ycf21 gene product                          | 9.8 ± 0.4  | 1.3 ± 0.1  |
| sll1330                                                                           | <i>rre37</i> | Two-component response regulator            | 9.5 ± 0.3  | 1.5 ± 0.1  |
| slr0529                                                                           | <i>ggtB</i>  | Glucosylglycerol transport system           | 9.0 ± 0.2  | 1.3 ± 0.1  |
| sll1652                                                                           |              | Hypothetical protein                        | 8.8 ± 0.2  | 3.3 ± 0.1  |
| sll1566                                                                           | <i>ggpS</i>  | Glucosylglycerol-phosphate synthase         | 8.8 ± 1.1  | 1.1 ± 0.1  |
| ssl2971                                                                           |              | Hypothetical protein                        | 8.7 ± 0.6  | 2.0 ± 0.1  |
| slr0581                                                                           |              | Hypothetical protein                        | 8.6 ± 0.3  | 1.8 ± 0.1  |
| slr1738                                                                           |              | Hypothetical protein                        | 8.1 ± 0.3  | 0.9 ± 0.1  |
| sll1773                                                                           |              | Hypothetical protein                        | 7.8 ± 0.4  | 0.6 ± 0.1  |
| sll1086                                                                           |              | Hypothetical protein                        | 7.7 ± 0.5  | 3.1 ± 0.1  |
| sll1621                                                                           |              | Membrane protein                            | 7.3 ± 0.3  | 1.1 ± 0.1  |
| sll1965                                                                           |              | Hypothetical protein                        | 7.3 ± 0.7  | 1.3 ± 0.3  |

|         |               |                                       |           |           |
|---------|---------------|---------------------------------------|-----------|-----------|
| sll1723 |               | Hypothetical protein                  | 6.8 ± 0.5 | 1.2 ± 0.2 |
| sll1620 |               | Hypothetical protein                  | 6.7 ± 0.5 | 0.8 ± 0.2 |
| slr0251 | <i>ycf85</i>  | ABC transporter ATP-binding protein   | 6.3 ± 0.2 | 1.0 ± 0.2 |
| sll0416 | <i>groEL2</i> | 60 kDa chaperonin 2, GroEL2           | 6.2 ± 0.2 | 0.6 ± 0.1 |
| sll1549 |               | Salt-enhanced periplasmic protein     | 6.2 ± 0.3 | 1.6 ± 0.2 |
| slr1192 |               | Alcohol dehydrogenase family          | 5.9 ± 0.2 | 1.2 ± 0.1 |
| slr0530 | <i>ggtC</i>   | Glucosylglycerol transport system     | 5.9 ± 0.4 | 1.5 ± 0.2 |
| slr2006 |               | Hypothetical protein                  | 5.9 ± 0.2 | 1.4 ± 0.1 |
| slr0083 | <i>crhR</i>   | ATP-dependent RNA helicase            | 5.8 ± 0.2 | 2.9 ± 0.1 |
| sll1724 | <i>icsA</i>   | LPS glycosyltransferase IcsA          | 5.7 ± 0.2 | 1.7 ± 0.1 |
| sll0005 |               | Hypothetical protein                  | 5.7 ± 0.6 | 0.8 ± 0.1 |
| slr0853 | <i>rimI</i>   | Ribosomal alanine acetyltransferase   | 5.6 ± 0.9 | 1.5 ± 0.1 |
| slr0974 | <i>infC</i>   | Translation initiation factor IF-3    | 5.5 ± 0.3 | 1.2 ± 0.2 |
| ssl1633 | <i>hliC</i>   | CAB/ELIP/HLIP superfamily             | 5.4 ± 0.3 | 1.9 ± 0.2 |
| sll0169 |               | Hypothetical protein                  | 5.4 ± 0.4 | 0.5 ± 0.2 |
| slr0589 |               | Hypothetical protein                  | 5.4 ± 0.2 | 0.9 ± 0.2 |
| slr1894 |               | Hypothetical protein                  | 5.4 ± 0.2 | 1.6 ± 0.1 |
| slr0746 | <i>stpA</i>   | Glucosylglycerolphosphate phosphatase | 5.1 ± 0.2 | 1.6 ± 0.1 |
| sll1491 |               | Periplasmic WD-repeat protein         | 5.0 ± 0.5 | 0.6 ± 0.1 |

#### Genes whose NaCl inducibility was markedly enhanced by novobiocin treatment

|                |              |                                       |             |             |
|----------------|--------------|---------------------------------------|-------------|-------------|
| sll1862        |              | Hypothetical protein                  | 172.1 ± 5.5 | 372.3 ± 5.0 |
| sll1863        |              | Hypothetical protein                  | 166.5 ± 4.0 | 267.6 ± 4.2 |
| sll0462        |              | Hypothetical protein                  | 1.8 ± 0.2   | 23.0 ± 1.1  |
| slr1927        |              | Hypothetical protein                  | 2.4 ± 0.2   | 16.2 ± 0.4  |
| slr0798        | <i>ziaA</i>  | Zinc-transporting P-type ATPase       | 4.3 ± 0.4   | 13.2 ± 0.8  |
| slr1851        |              | Hypothetical protein                  | 2.5 ± 0.2   | 11.8 ± 0.4  |
| sll1558        |              | Mannose-1-phosphate guanyltransferase | 4.3 ± 0.4   | 11.3 ± 0.9  |
| <u>slr1392</u> | <i>feoB</i>  | Ferrous iron transport protein B      | 4.6 ± 0.3   | 11.2 ± 1.1  |
| sll1544        | <i>rre40</i> | two-component response regulator      | 1.1 ± 0.1   | 9.1 ± 0.9   |
| slr0550        | <i>dapA</i>  | Dihydrodipicolinate synthase          | 1.4 ± 0.2   | 7.0 ± 1.1   |

#### Genes whose NaCl inducibility was not affected by novobiocin treatment

|                |             |                                  |            |            |
|----------------|-------------|----------------------------------|------------|------------|
| <u>slr1687</u> |             | Hypothetical protein             | 15.7 ± 2.1 | 13.8 ± 2.0 |
| slr1204        | <i>htrA</i> | Serine protease HtrA             | 11.4 ± 1.5 | 7.5 ± 0.5  |
| slr0093        | <i>dnaJ</i> | DnaJ protein. heat shock protein | 9.9 ± 0.5  | 12.8 ± 2.6 |
| slr1916        |             | Esterase                         | 7.7 ± 0.4  | 5.5 ± 0.5  |
| sll1653        | <i>menG</i> | Phylloquinone methyltransferase  | 6.5 ± 0.3  | 4.4 ± 0.6  |
| slr0095        |             | O-Methyltransferase              | 6.0 ± 0.9  | 7.8 ± 0.6  |

Cells, which had been grown under normal conditions and then incubated in the presence (50 µg ml<sup>-1</sup>) or absence of novobiocin for 30 min, were incubated with 0.5 M NaCl for 30 min. Each value indicates the ratio of the level of the transcript in salt-stressed cells in the presence of

novobiocin to that in salt stressed cells in the absence of novobiocin. The numbering of open reading frames (ORFs) corresponds to that in the database on the Cyanobase website (<http://bacteria.kazusa.or.jp/cyano/Synechocystis/>). This table lists the salt stress-inducible genes with induction factors higher than 4.0 in control cells (average of values from 2-3 independent experiments). The entire list can be accessed at [http://www.genome.jp/kegg-bin/get\\_htext?htext=Exp\\_DB&hier=1](http://www.genome.jp/kegg-bin/get_htext?htext=Exp_DB&hier=1). Genes that had been used as probes in Northern blotting are underlined. IF – induction factor; NB – novobiocin. The table represents the results of two independent experiments.
