# Supplementary material for: DNA supercoiling regulates the stress-inducible expression of genes in the cyanobacterium Synechocystis
Source: Royal Society of Chemistry journal article supplement (doi:10.1039/b903022k), 2009-09-10
Supplement: table_s4.pdf [file table_s4.pdf]

**Table S4.** The effect of novobiocin on heat-induced gene expression

| ORF                                                                               | gene                 | Product                                    | IF -NB     | IF +NB     |
|-----------------------------------------------------------------------------------|----------------------|--------------------------------------------|------------|------------|
| <b>Genes whose heat inducibility was markedly reduced by novobiocin treatment</b> |                      |                                            |            |            |
| sll0430                                                                           | <i>htpG</i>          | HtpG, heat shock protein 90                | 43.2 ± 2.1 | 10.2 ± 1.4 |
| slr2075                                                                           | <i>groES</i>         | 10 kD chaperonin, GroES protein            | 30.2 ± 1.1 | 5.4 ± 0.4  |
| slr2076                                                                           | <i>groEL1</i>        | 60 kDa chaperonin 1, GroEL1                | 23.4 ± 3.0 | 4.4 ± 0.4  |
| <u>sll0416</u>                                                                    | <u><i>groEL2</i></u> | 60 kDa chaperonin 2, GroEL2                | 16.7 ± 2.5 | 3.6 ± 0.2  |
| sll0170                                                                           | <i>dnaK2</i>         | DnaK protein 2, heat shock protein 70      | 15.5 ± 1.5 | 9.6 ± 0.2  |
| slr1963                                                                           |                      | Water-soluble carotenoid protein           | 12.9 ± 1.5 | 5.7 ± 0.2  |
| slr1516                                                                           | <i>sodB</i>          | Superoxide dismutase                       | 10.6 ± 2.0 | 4.5 ± 0.2  |
| sll0441                                                                           |                      | Hypothetical protein                       | 9.4 ± 0.7  | 1.2 ± 0.1  |
| ssl2971                                                                           |                      | Hypothetical protein                       | 9.2 ± 0.5  | 4.2 ± 0.3  |
| sll1041                                                                           |                      | ABC transporter ATP-binding protein        | 8.3 ± 0.8  | 0.9 ± 0.1  |
| sll1106                                                                           |                      | Hypothetical protein                       | 6.6 ± 0.3  | 1.0 ± 0.1  |
| slr1603                                                                           |                      | Hypothetical protein                       | 6.1 ± 0.4  | 3.9 ± 0.4  |
| sll1621                                                                           |                      | Membrane protein                           | 6.0 ± 0.2  | 1.6 ± 0.2  |
| slr0156                                                                           | <i>clpB2</i>         | ClpB protein                               | 4.8 ± 0.3  | 0.8 ± 0.1  |
| slr1634                                                                           |                      | Hypothetical protein                       | 4.3 ± 0.2  | 0.2 ± 0.1  |
| sll0575                                                                           | <i>rfbB</i>          | Export system ATP-binding protein          | 4.3 ± 0.2  | 0.8 ± 0.1  |
| <b>Genes whose heat inducibility was enhanced by novobiocin treatment</b>         |                      |                                            |            |            |
| slr0093                                                                           | <i>dnaJ</i>          | DnaJ protein, molecular chaperone          | 10.3 ± 0.7 | 88.4 ± 3.0 |
| slr1674                                                                           |                      | Hypothetical protein                       | 22.6 ± 2.1 | 40.9 ± 2.6 |
| slr0095                                                                           |                      | O-methyltransferase                        | 3.7 ± 0.2  | 40.6 ± 3.5 |
| sll1652                                                                           |                      | Hypothetical protein                       | 1.9 ± 0.1  | 41.0 ± 2.5 |
| sll0939                                                                           |                      | Hypothetical protein                       | 3.0 ± 0.1  | 36.2 ± 2.8 |
| sll0843                                                                           |                      | Hypothetical protein                       | 1.9 ± 0.1  | 33.3 ± 3.1 |
| slr1675                                                                           | <i>hypA1</i>         | Putative hydrogenase                       | 15.9 ± 1.0 | 32.1 ± 3.0 |
| slr0798                                                                           | <i>ziaA</i>          | Zinc-transporting P-type ATPase            | 0.9 ± 0.2  | 31.2 ± 2.0 |
| <u>sll0306</u>                                                                    | <u><i>sigB</i></u>   | RNA polymerase group 2 sigma factor        | 11.5 ± 1.0 | 26.8 ± 2.2 |
| sll0938                                                                           |                      | N-succinyldiaminopimelate aminotransferase | 1.3 ± 0.3  | 26.0 ± 1.4 |
| slr0272                                                                           |                      | Hypothetical protein                       | 1.2 ± 0.1  | 25.5 ± 2.3 |
| slr2037                                                                           |                      | Hypothetical protein                       | 1.0 ± 0.1  | 20.8 ± 1.4 |
| slr1185                                                                           | <i>petC2</i>         | Rieske iron sulfur protein                 | 1.0 ± 0.1  | 19.2 ± 0.8 |
| slr1398                                                                           |                      | Hypothetical protein                       | 1.2 ± 0.2  | 19.2 ± 1.6 |
| slr1851                                                                           |                      | Hypothetical protein                       | 1.7 ± 0.1  | 18.9 ± 1.1 |
| sll1549                                                                           |                      | Salt-enhanced periplasmic protein          | 1.5 ± 0.2  | 18.5 ± 1.0 |
| slr1204                                                                           | <i>htrA</i>          | Serine protease HtrA                       | 5.6 ± 0.4  | 18.2 ± 1.2 |
| sll1863                                                                           |                      | Hypothetical protein                       | 1.2 ± 0.1  | 18.2 ± 1.2 |
| slr0967                                                                           |                      | Hypothetical protein                       | 5.1 ± 0.4  | 16.8 ± 2.1 |
| slr1915                                                                           |                      | Hypothetical protein                       | 6.8 ± 0.8  | 15.7 ± 1.4 |
| slr1413                                                                           |                      | Hypothetical protein                       | 4.4 ± 0.2  | 18.0 ± 2.4 |
| slr0271                                                                           |                      | Hypothetical protein                       | 1.6 ± 0.3  | 17.2 ± 1.3 |
| sll0790                                                                           | <i>hik31</i>         | Sensor histidine kinase Hik31              | 0.7 ± 0.1  | 16.0 ± 1.1 |
| sll1862                                                                           |                      | Hypothetical protein                       | 1.4 ± 0.2  | 15.2 ± 0.5 |
| sll0528                                                                           |                      | Hypothetical protein                       | 6.3 ± 0.5  | 14.1 ± 1.1 |
| sll0877                                                                           |                      | Hypothetical protein                       | 1.1 ± 0.1  | 13.9 ± 1.0 |
| sll0038                                                                           | <i>rre36</i>         | Two-component response regulator           | 0.9 ± 0.1  | 13.3 ± 2.1 |
| slr1916                                                                           |                      | Esterase                                   | 1.5 ± 0.1  | 13.2 ± 0.5 |
| sll1849                                                                           |                      | Hypothetical protein                       | 1.2 ± 0.3  | 13.1 ± 1.0 |
| ssl3769                                                                           |                      | Hypothetical protein                       | 0.8 ± 0.1  | 12.6 ± 2.0 |
| slr0518                                                                           | <i>abfB</i>          | Arabinofuranosidase                        | 1.6 ± 0.2  | 12.2 ± 0.9 |

|         |              |                                           |           |            |
|---------|--------------|-------------------------------------------|-----------|------------|
| slI0360 |              | Hypothetical protein                      | 1.1 ± 0.2 | 10.8 ± 0.5 |
| slr1676 |              | Hypothetical protein                      | 1.5 ± 0.3 | 11.4 ± 0.7 |
| slr1927 |              | Hypothetical protein                      | 0.5 ± 0.1 | 10.6 ± 0.5 |
| slr0549 | <i>asd</i>   | Aspartate beta-semialdehyde dehydrogenase | 0.7 ± 0.1 | 10.2 ± 0.8 |
| slr1906 |              | Hypothetical protein                      | 0.9 ± 0.2 | 10.0 ± 0.5 |
| slr0210 | <i>hik9</i>  | Sensor histidine kinase Hik9              | 1.1 ± 0.1 | 9.9 ± 0.8  |
| slr1245 |              | Transcriptional regulator                 | 1.1 ± 0.2 | 9.6 ± 0.8  |
| slr0550 | <i>dapA</i>  | Dihydrodipicolinate synthase              | 0.6 ± 0.2 | 8.5 ± 0.5  |
| slI0462 |              | Hypothetical protein                      | 0.6 ± 0.1 | 8.2 ± 0.3  |
| slr1042 | <i>rre7</i>  | Two-component response regulator          | 1.0 ± 0.1 | 6.8 ± 0.2  |
| slr1285 | <i>hik34</i> | Sensor histidine kinase Hik34             | 3.1 ± 0.2 | 6.5 ± 0.2  |
| slI0039 | <i>rre35</i> | Two-component response regulator          | 0.7 ± 0.1 | 5.7 ± 0.2  |
| slI1786 | <i>tatD</i>  | Putative deoxyribonuclease, TatD          | 0.3 ± 0.1 | 4.3 ± 0.1  |
| slr1305 | <i>rre41</i> | Two-component response regulator          | 1.1 ± 0.2 | 3.8 ± 0.3  |

**Genes whose heat inducibility was not affected by novobiocin treatment**

|                |                    |                                       |            |            |
|----------------|--------------------|---------------------------------------|------------|------------|
| <u>slI1514</u> | <u><i>hspA</i></u> | 16.6 kDa small heat shock protein     | 66.2 ± 3.2 | 52.8 ± 2.5 |
| slr1641        | <i>clpB1</i>       | ClpB protein                          | 58.9 ± 3.0 | 40.2 ± 4.1 |
| slI0846        |                    | Hypothetical protein                  | 17.0 ± 2.0 | 15.9 ± 0.9 |
| slr0008        | <i>ctpA</i>        | Carboxyl-terminal processing protease | 4.8 ± 0.4  | 4.4 ± 0.2  |

Cells, which had been grown under normal conditions and then incubated in the presence (50 µg ml<sup>-1</sup>) or absence of novobiocin at 34°C for 30 min, were incubated at 44°C for 30 min. Each value indicates the ratio of the level of the transcript in heat-stressed cells in the presence of novobiocin to that in heat-stressed cells in the absence of novobiocin. The numbering of open reading frames (ORFs) corresponds to that in the database on the Cyanobase website (<http://bacteria.kazusa.or.jp/cyano/Synechocystis/>). This table lists the heat stress-inducible genes with induction factors higher than 4.0 in control cells (average of values from 2-3 independent experiments). The entire list can be accessed at [http://www.genome.jp/kegg-bin/get\\_htext?htext=Exp\\_DB&hier=1](http://www.genome.jp/kegg-bin/get_htext?htext=Exp_DB&hier=1). Genes that had been used as probes in Northern blotting are underlined. IF – induction factor; NB – novobiocin. The table represents the results of two independent experiments.
